# Supplementary material for: Wnt/β-catenin signaling stimulates the expression and synaptic clustering of the autism-associated Neuroligin 3 gene
Source: PubMed Central journal article supplement (PMC5835496; doi:10.1038/s41398-018-0093-y), 2018-03-05

# Supplementary Figure S3

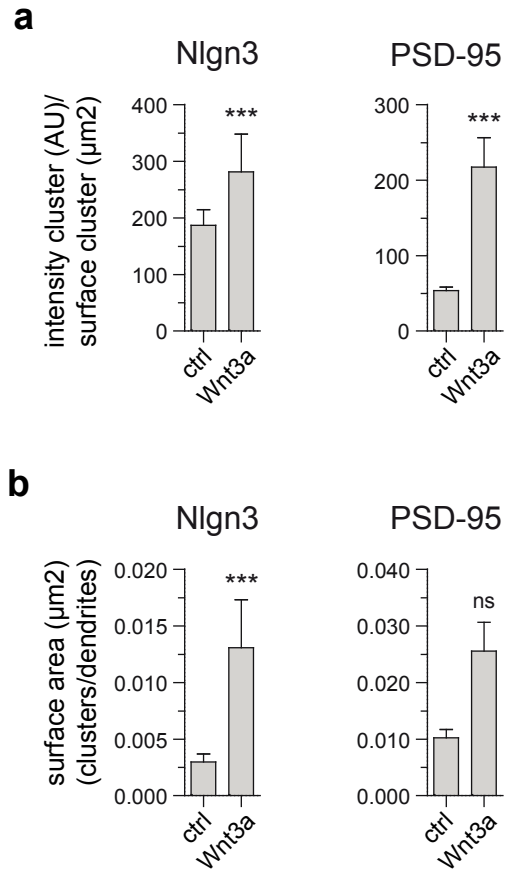

Supplement: 41398_2018_93_MOESM3_ESM.pdf [file 41398_2018_93_MOESM3_ESM.pdf]
