# Supplementary material for: Wnt/β-catenin signaling stimulates the expression and synaptic clustering of the autism-associated Neuroligin 3 gene
Source: PubMed Central journal article supplement (PMC5835496; doi:10.1038/s41398-018-0093-y), 2018-03-05
Supplement: 41398_2018_93_MOESM4_ESM.pdf [file 41398_2018_93_MOESM4_ESM.pdf]

**Supplementary Table S1.** Primers used in our study.

| <b>assay</b>     | <b>primer</b>   | <b>sequence</b>            |
|------------------|-----------------|----------------------------|
| <b>qPCR</b>      | Nlgn3Mm-FW      | CATGGAAGGAACAGGCAACA       |
|                  | Nlgn3Mm-RV      | ACGGGGATCTCCTCCAAAGA       |
|                  | Rpl13aMm_FW     | CACTCTGGAGGAGAAACGGAAGG    |
|                  | Rpl13aMm_RV     | GCAGGCATGAGGCAAACAGTC      |
|                  | CmycMm_FW       | CTGCTGTCTCCGAGTCCT         |
|                  | CmycMm_RV       | GCCTCTTCTCCACAGACACC       |
|                  | Ctnnb1Mm_FW     | CAGCGCTGGTGAAAATGCTT       |
|                  | Ctnnb1Mm_RV     | CTGCAGTCCACCAGCTAGGC       |
|                  | Nlgn3Rn-FW      | CCCTATGTTTTTGGTGTCCCTA     |
|                  | Nlgn3Rn-RV      | CCTTGGTGTGAATGAACTTGG      |
|                  | Rpl13aRn_FW     | ACAAGAAAAAGCGGATGGTG       |
|                  | Rpl13aRn_RV     | TTCCGGTAATGGATCTTTGC       |
|                  | CmycRn_FW       | TCTCTTCTTCTCGGACTCG        |
|                  | CmycRn_RV       | CACCACATCAATTTCTTCCTCA     |
|                  | <b>Cloning</b>  | pNL3Mm-XhoI-FW             |
| pNL3Mm-BglII-RV1 |                 | GAAGATCTTCTGGGGGCTTAGAGGAA |
| pNL3Mm-BglII-RV2 |                 | GAAGATCTTCTTGGAATGTGCAATC  |
| pNL3Rn-FW        |                 | TGAAACATTGAACTGTTGGGTTTTG  |
| pNL3Rn-RV        |                 | GATGATAGGGATGCAGGATTTAGGG  |
| <b>ChIP</b>      | Nlgn3_Fw_TBE2-3 | GTGATTGCACCTTGGGTGGT       |
|                  | Nlgn3_Rv_TBE2-3 | ACACACACACCCACCACGTC       |
|                  | Nlgn3_Fw_TBE4   | CCCTATCACTGGGAGGTGTCA      |
|                  | Nlgn3_Rv_TBE4   | TGCTTCAGTTGTGCTGGCTTT      |
|                  | Nlgn3_Fw_TBE5   | TGTGAGAGTACCGGGGAAAGG      |
|                  | Nlgn3_Rv_TBE5   | CTTGGAGCTCATTCGGGTTG       |
|                  | Nlgn3_Fw_TBE6   | GAAACATTGAACTGTTGGGTTTTG   |
|                  | Nlgn3_Rv_TBE6   | GAGGAGGGAGACGATGCAGA       |
